# Supplementary material for: Advanced Intestinal Cancers often Maintain a Multi-Ancestral Architecture
Source: PubMed Central journal article supplement (PMC4769224; doi:10.1371/journal.pone.0150170), 2016-02-26

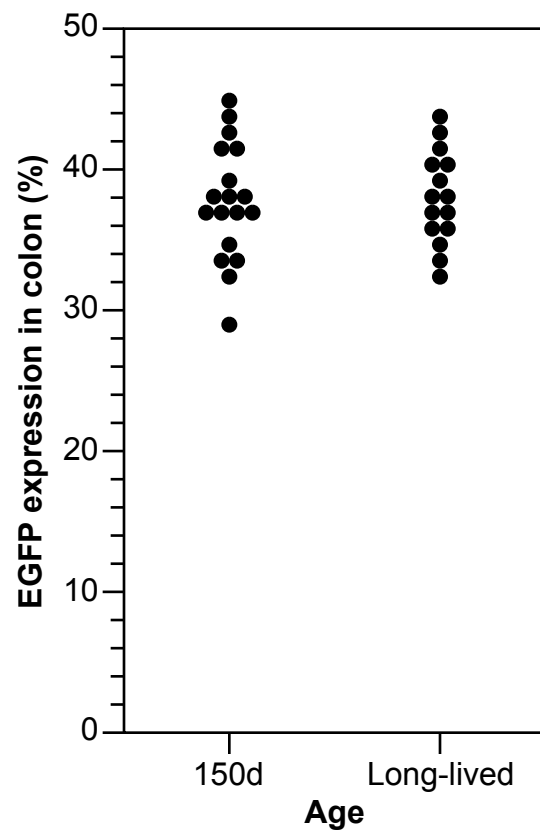

Supplement: pone.0150170.s006.pdf [file pone.0150170.s006.pdf]
