# Supplementary material for: Advanced Intestinal Cancers often Maintain a Multi-Ancestral Architecture
Source: PubMed Central journal article supplement (PMC4769224; doi:10.1371/journal.pone.0150170), 2016-02-26
Supplement: pone.0150170.s008.pdf [file pone.0150170.s008.pdf]

**S1 Table. Primers used for *Apc* sequencing**

| Primer Name | Forward primer        |                          | Reverse primer       |                          | Product Size (bp) |
|-------------|-----------------------|--------------------------|----------------------|--------------------------|-------------------|
|             | Sequence              | Melting temperature (°C) | Sequence             | Melting temperature (°C) |                   |
| ApcEx15a-1  | CACGTTAGGAAACAGAAAGC  | 58.3                     | AAAAGCATAGTCACCATAAA | 54.7                     | 147               |
| ApcEx15a-2  | CGGAGTAAGCAGAGACACAA  | 60.7                     | TCTAAACTTCCCCTTGAGGA | 59.3                     | 170               |
| ApcEx15a-3  | CATGACTGTTCTTTCACCAT  | 57.4                     | TCGTTTTGATGAGGTTCTG  | 59.3                     | 175               |
| ApcEx15a-4  | GCCTCAGTGCTTACCATCCA  | 63.2                     | CTGTCGTCTGCCACACAATG | 62.5                     | 181               |
| ApcEx15a-5  | TCCCAGGACGACAGAAGTTC  | 62.5                     | TGGCATAAGGCATAGAGCAT | 60.7                     | 160               |
| ApcEx15b-1  | GGTGCAGTTCATTATCATCA  | 57.3                     | CTCTAGCATTCTGGGACT   | 60.1                     | 177               |
| ApcEx15b-2  | AATGATGTAACCTCGGTCAGC | 59.2                     | GGGGGACTTTTGGGTGTCTG | 63.9                     | 194               |
| ApcEx15b-3  | GCCAAGTCTCCCTCCAAAAG  | 61.9                     | GCCACTCACCATTCCACTAC | 61.6                     | 177               |
| ApcEx15b-4  | TTTGAGAGTCGCTCCATTGC  | 61.9                     | ACTTTACTTTTTGGCACCTC | 57.9                     | 185               |
| ApcEx15b-5  | ACCTCCTCCACAGACAGTGC  | 64.8                     | GCTGGAGGAACAAGAAAACC | 60.4                     | 196               |
