# Supplementary material for: Advanced Intestinal Cancers often Maintain a Multi-Ancestral Architecture
Source: PubMed Central journal article supplement (PMC4769224; doi:10.1371/journal.pone.0150170), 2016-02-26
Supplement: pone.0150170.s009.pdf [file pone.0150170.s009.pdf]

**S2 Table. 3D reconstruction of polyclonal adenomas revealed the number of discrete clones.**

| Tumor ID | Intestinal region      | N of distinct regions |       |
|----------|------------------------|-----------------------|-------|
|          |                        | Red                   | Green |
| 6105C    | Distal small intestine | 1                     | 3     |
| 3859E    | Distal small intestine | 1                     | 2     |
| 3862C    | Distal small intestine | 1                     | 2     |
| 3862E    | Distal small intestine | 1                     | 1     |
| 4000A    | Colon                  | 1                     | 1     |
