# Supplementary material for: Advanced Intestinal Cancers often Maintain a Multi-Ancestral Architecture
Source: PubMed Central journal article supplement (PMC4769224; doi:10.1371/journal.pone.0150170), 2016-02-26
Supplement: pone.0150170.s010.pdf [file pone.0150170.s010.pdf]

**S3 Table. The pattern of mosaicism does not change with age.** SI, small intestine.

| Intestinal section | Percentage of tissue expressing EGFP, mean $\pm$ SD |                             | p value<br>(t-test) |
|--------------------|-----------------------------------------------------|-----------------------------|---------------------|
|                    | 150 day old mice<br>(n = 18)                        | Long-lived mice<br>(n = 15) |                     |
| SI section 1       | 0.0 $\pm$ 0.0                                       | 0.0 $\pm$ 0.0               | 0.26                |
| SI section 2       | 0.0 $\pm$ 0.0                                       | 0.1 $\pm$ 0.1               | 0.07                |
| SI section 3       | 0.4 $\pm$ 0.6                                       | 0.5 $\pm$ 0.6               | 0.68                |
| SI section 4       | 12.0 $\pm$ 2.6                                      | 11.5 $\pm$ 1.4              | 0.33                |
| Colon              | 37.6 $\pm$ 4.1                                      | 38.1 $\pm$ 3.3              | 0.46                |
